# Supplementary material
Source: HighWire-hosted journal article supplement (http://www.cmaj.ca/highwire/filestream/59082/field_highwire_adjunct_files/3/copd-stiell-4-at.pdf)
Supplement: copd-stiell-4-at.pdf [file copd-stiell-4-at.pdf]

**Appendix 4 (as supplied by authors): Validation of Classification Performance of the Serious Adverse Event Score in COPD using Bootstrapping**

| Score            | Observed Sensitivity (95% CI) | Observed Specificity (95% CI) | Observed PLR (95% CI)  | Observed NLR (95% CI) | Bootstrap Sensitivity (95% CI) | Bootstrap Specificity (95% CI) | Bootstrap PLR (95% CI) | Bootstrap NLR (95% CI) |
|------------------|-------------------------------|-------------------------------|------------------------|-----------------------|--------------------------------|--------------------------------|------------------------|------------------------|
| 0                | 1.00<br>(0.93,1.00)           | 0<br>(0,0)                    | 1.00<br>(1.00,1.00)    | Not Estimable         | 1.00<br>(1.00,1.00)            | 0<br>(0,0)                     | 1.00<br>(1.00,1.00)    | Not Estimable          |
| 1                | 0.91<br>(0.81,0.96)           | 0.45<br>(0.42,0.49)           | 1.67<br>(1.51,1.84)    | 0.20<br>(0.09,0.42)   | 0.91<br>(0.91,0.91)            | 0.45<br>(0.45,0.46)            | 1.67<br>(1.66,1.67)    | 0.20<br>(0.19,0.20)    |
| 2                | 0.81<br>(0.69,0.89)           | 0.60<br>(0.57,0.64)           | 2.03<br>(1.75,2.34)    | 0.32<br>(0.20,0.52)   | 0.81<br>(0.80,0.81)            | 0.60<br>(0.59,0.60)            | 2.02<br>(2.01,2.03)    | 0.32<br>(0.31,0.33)    |
| 3                | 0.60<br>(0.48,0.72)           | 0.84<br>(0.81,0.86)           | 3.66<br>(2.85,4.69)    | 0.48<br>(0.35,0.64)   | 0.60<br>(0.59,0.61)            | 0.84<br>(0.83,0.84)            | 3.67<br>(3.64,3.70)    | 0.48<br>(0.47,0.48)    |
| 4                | 0.52<br>(0.39,0.64)           | 0.90<br>(0.87,0.92)           | 4.99<br>(3.66,6.81)    | 0.54<br>(0.42,0.69)   | 0.51<br>(0.51,0.53)            | 0.89<br>(0.89,0.90)            | 5.04<br>(4.99,5.09)    | 0.54<br>(0.53,0.55)    |
| 5                | 0.25<br>(0.16,0.37)           | 0.97<br>(0.95,0.98)           | 8.08<br>(4.57,14.29)   | 0.77<br>(0.67,0.89)   | 0.25<br>(0.24,0.25)            | 0.97<br>(0.96,0.97)            | 8.39<br>(8.23,8.55)    | 0.78<br>(0.77,0.78)    |
| 6                | 0.19<br>(0.11,0.31)           | 0.99<br>(0.98,0.99)           | 16.48<br>(7.31,37.16)  | 0.82<br>(0.73,0.92)   | 0.19<br>(0.18,0.19)            | 0.99<br>(0.98,0.99)            | 18.69<br>(18.06,19.33) | 0.82<br>(0.81,0.82)    |
| 7                | 0.07<br>(0.03,0.17)           | 0.99<br>(0.99,1.00)           | 19.02<br>(4.65,77.88)  | 0.93<br>(0.87,1.00)   | 0.07<br>(0.07,0.08)            | 0.99<br>(0.99,1.00)            | 22.91<br>(21.71,24.11) | 0.93<br>(0.92,0.93)    |
| 8                | 0.06<br>(0.02,0.15)           | 0.99<br>(0.99,1.00)           | 45.65<br>(5.17,402.70) | 0.94<br>(0.89,1.00)   | 0.06<br>(0.05,0.06)            | 0.99<br>(0.99,1.00)            | 33.86<br>(32.21,35.51) | 0.94<br>(0.93,0.94)    |
| 10               | 0.03<br>(0.01,0.11)           | 1.00<br>(0.99,1.00)           | Not Estimable          | 0.97<br>(0.93,1.01)   | 0.03<br>(0.03,0.04)            | 1.00<br>(1.00,1.00)            | Not Estimable          | 0.97<br>(0.96,0.97)    |
| <b>AUC</b>       | 0.79<br>(0.74,0.85)           |                               |                        |                       | 0.79<br>(0.79,0.80)            |                                |                        |                        |
| <b>HL test P</b> | 0.665                         |                               |                        |                       | 0.256                          |                                |                        |                        |

AUC=area under ROC; HL=Hosmer Lemeshow; PLR=Positive likelihood ratio; NLR=Negative likelihood ratio
